# Supplementary material for: Optimal synaptic signaling connectome for locomotory behavior in Caenorhabditis elegans: Design minimizing energy cost
Source: PubMed Central journal article supplement (PMC5714387; doi:10.1371/journal.pcbi.1005834), 2017-11-20
Supplement: pcbi.1005834.s001.pdf [file pcbi.1005834.s001.pdf]

**Supporting Information for:**

**„Optimal synaptic signaling connectome for locomotory behavior in C. elegans: design minimizing energy cost”**

Franciszek Rakowski<sup>a,b</sup> and Jan Karbowski<sup>c</sup>

<sup>a</sup> *Interdisciplinary Centre for Mathematical and Computational Modeling, University of Warsaw, 02-097 Warsaw, Poland;*

<sup>b</sup> *Mossakowski Medical Research Centre, Polish Academy of Sciences, 02-106 Warsaw, Poland;*

<sup>c</sup> *Institute of Applied Mathematics and Mechanics, Department of Mathematics, Informatics and Mechanics, University of Warsaw, 02-097 Warsaw, Poland.*

**(\*A Mathematica Notebook performing the single point goal function calculation, for the C.Elegans model.  
by F. Rakowski  
last mod. 05.04.2017\*)**

(\* Reading sources: \*)

```
srcfiles={"CElegansExperimtalData.m", "CElegansPhysMorphData.m", "CElegansSolver.m", "CElegansUtils.m"};
```

```
For[i=1, i<=Length[srcfiles], i++, Get[srcfiles[[i]]]]
```

Set up parameters:

```
mask=prog[.75,∞,connSW]; (*Set up the mask for synnaptic connections*)
```

```
poze=Position[mask,1]; (*Position list of supraThreshold synapses *)
```

```
dox=3.6 Insert[Tuples[{-1,1},7],0,Flatten[Table[{{n,7},{n,7}},
```

```
{n,1,Length[Tuples[{-1,1},7]]},1]]; (* input combination *)
```

```
qqs=0.039; (* conductivity for chemical synapses *)
```

```
qqe=0.042; (* conductivity for gap junctions *)
```

```
cASH=0.5; ffASH=-0.8;(* parameters of ASH neuron *)
```

```
θθ=prepareθ[hfun1,hfun2,hfun2]; γγ=prepareγ[hfun1,hfun2,hfun2];(* parametres of the sigmoidal H function *)
```

```
ηη=2; (* η *)
```

```
headI=32; (* number of the external input variant *)
```

```
combNum=1; (* number of the Synaptic type (polarity) variant *)
```

(\* Compute the goal functions: ED and SED: \*)

(\* Compute the goal function for the fixed parameter set: the euclidean distance \*)

```
edGoalFun[mask,qqs, qqe, cASH,ffASH, θθ , γγ , ηη, headI, combNum]
```

(\* Compute the goal function for the fixed parameter set: the standardized euclidean distance \*)

```
sedGoalFun[mask,qqs, qqe, cASH,ffASH, θθ , γγ , ηη, headI, combNum]
```

(\* Graphical comparison of the model with the experimental data. \*)

```
Needs["ErrorBarPlots`"]
```

```

CElegansDiff=eFun[diffAllAblations[mask,qqs, qqe, cASH,ffASH, 00 , yy , ηη,
headI, combNum],ηη];
modelVSexperiment=ListPlot[{CElegansDiff,expTfTbunit,CElegansDiff,expTfTbunit},P
lotRange->{0.2,1.1},Joined->{True,True,False,False},PlotStyle-
>{{Darker[Red],Dashed},{Darker[Blue],Dashed},{Darker[Red],PointSize[Large]},
{Darker[Blue],PointSize[Large]}},Axes->False,Frame->{True,True,False,False},
FrameTicks->{{All,None},{Table[{i,nlabels[[i]]},{i,1,18}],None}},
FrameLabel->{"Ablation",Rotate["Tf/(Tf-Tb)",-90 Degree]},LabelStyle-
>{Bold,Black,12},PlotLegends->{None,None,"model","experiment"}];
Show[modelVSexperiment,ErrorListPlot[{expTfTbunit,errTfTbunit}]/Transpose]]

```

**(\* L I B R A R I E S \*)**

**(\* Mathematica package CElegansSolver.m  
by F. Rakowski.  
last mod. 05.04.2017 \*)**

(\* Definition of ODE's, and goal functions\*)

(\* Auxiliary functions and function declarations\*)

```

funH[x_,\[Gamma]_,\[Theta]_]:=1/(1+E^(-\[Gamma](x-\[Theta])));
m[i_]:=1/(1+E^(-(fn[[i]]+20)/9));
citer[j_]:=Table[i,{i,Drop[{1,2,3,4,5,6,7,8,9},{j}]}];
fn={ash[t],ava[t],avb[t],avd[t],ave[t],dva[t],eb[t],ef[t],pvc[t],x[t]};
ca={cash[t],cava[t],cavb[t],cavd[t],cave[t],cdva[t],ceb[t],cef[t],cpvc[t]};

```

```

ur[nonZeroSW_, nonZeroGJ_, a_, \[Epsilon]_,x_,physParam_,physVarParam_]:=
Module[{eqnsVolMotN, eqnsVolIntN, eqnsVol, eqnsCon, initialsVol,
initialsCon},

```

(\* Routine creating the ODE's

nonZeroSW - synaptic weights,

nonZeroGJ - gap junction weights,

a - ablation vector,

\[Epsilon] - synaptic type: 0 - inhibitory, 1 - excitatory

x - input vector

\*)

eqnsVolIntN =

```

Table[cC D[fn[[i]], t] == -gL (fn[[i]] - v1) -
gCa m[i]^2 (fn[[i]] - vCa) -
gKCa ca[[i]]/(kD + ca[[i]]) (fn[[i]] - vK) -
Sum[a[[j]] nonZeroSW[[i, j]] funH[
fn[[j]], (\[Gamma]/.physVarParam)[[j]], (\[Theta]/.physVarParam)[[j]]]
(fn[[i]] - (1 - \[Epsilon][[i,
j]]) vCl), {j, citer[i]}]
- Sum[
a[[i]] a[[j]] nonZeroGJ[[i, j]] (fn[[i]] - fn[[j]]), {j,
citer[i]}] + x[[i]](1 + a[[1]] fASH funH[fn[[1]],(\[Gamma]/.physVarPa-
ram)[[1]],(\[Theta]/.physVarParam)[[1]]]), {i, {2, 3, 4, 5, 6, 9}}];

```

eqnsVolMotN =

```

Table[cC D[fn[[i]], t] == -gL (fn[[i]] - v1) -
Sum[a[[j]] nonZeroSW[[i, j]] funH[
fn[[j]], (\[Gamma]/.physVarParam)[[j]], (\[Theta]/.physVarParam)[[j]]]
(fn[[i]] - (1 - \[Epsilon][[i,
j]]) vCl), {j, citer[i]}] -
Sum[a[[i]] a[[j]] nonZeroGJ[[i, j]] (fn[[i]] - fn[[j]]), {j,
citer[i]}], {i, {7, 8}}];

```

eqnsVol =

```

Flatten[{eqnsVolIntN[[1 ;; 5]], eqnsVolMotN, eqnsVolIntN[[6]]}];
initialsVol = Table[(fn[[i]] /. t -> 0) == 2, {i, 2, 9}];

```

```

eqnsCon =
  Table[D[ca[[i]], t] == -ca[[i]]/tauCa -
    2 gCa (m[i]^2)/(d far) (fn[[i]] - vCa), {i, {2, 3, 4, 5, 6,
    9}}];
initialsCon =
  Table[(ca[[i]] /. t -> 0) == 2, {i, {2, 3, 4, 5, 6, 9}}];

eqnini = Join[eqnsVol, eqnsCon, initialsVol, initialsCon];
eqnini/.Join[physParam,physVarParam]
]

efeb[nonZeroSW_, nonZeroGJ_, a_, \[Epsilon]_,x_,physParam_,physVarParam_] :=
Module[{solutionBDF, feb, fef},
  solutionBDF =
  NDSolve[ur[nonZeroSW, nonZeroGJ, a, \[Epsilon],x,physParam,physVarParam],
    Join[fn[[2 ;; 9]], ca[[{2, 3, 4, 5, 6, 9}]]], {t, 0, 4000},
    Method -> {"BDF"}];

  feb = (eb[t] /. solutionBDF[[1, 6]]) /. t -> 3000;
  fef = (ef[t] /. solutionBDF[[1, 7]]) /. t -> 3000;
  {fef, feb}

]
diffSingleAblation[nonZeroSW_, nonZeroGJ_, a_, \[Epsilon]_,x_,physParam_,phys-
VarParam_] :=
Module[{solutionBDF, feb, fef},
  solutionBDF =
  NDSolve[ur[nonZeroSW, nonZeroGJ, a, \[Epsilon],x,physParam,physVarParam],
    Join[fn[[2 ;; 9]], ca[[{2, 3, 4, 5, 6, 9}]]], {t, 0, 4000},
    Method -> {"BDF"}];
  feb = (eb[t] /. solutionBDF[[1, 6]]) /. t -> 3000;
  fef = (ef[t] /. solutionBDF[[1, 7]]) /. t -> 3000;
  fef-feb
]
(* Euclidean distance goal function *)
edGoalFun::usage =
"arg: maska, qs, qe, ashCoeff,fASH, \[Theta], \[Gamma], \[Eta], HeadInput \
Number, SynnapticCombination Number";
edGoalFun[mask_?NumberQ, qs_?NumberQ, qe_?NumberQ, ashCoeff_?NumberQ, tmpfASH_?NumberQ,
tmp\[Theta]_, tmp\[Gamma]_, \[Eta]_?NumberQ, k_?NumberQ,
l_?NumberQ] := Module[{CSW, CGJ, tmpPar, kk},
(*arg: mask - maska connectomu, qs,qe, ashCoeff,\[Theta],\[Gamma],No of input
Comb,
No of synnaptic Comb,\[Eta]*)
CSW = connSW qs mask;
CGJ = connGJ qe;
tmpPar = {\[Gamma] -> tmp\[Gamma], \[Theta] -> tmp\[Theta],
  ash[t] -> ashCoeff * tmp\[Theta][[1]], fASH -> tmpfASH};

kk = Table[
  diffSingleAblation[CSW, CGJ, abl[[i]], polarMatrixSubst[1], dox[[k]], phys-
Param,
  tmpPar], {i, 1, Length[abl]}}];
compTfTb[kk, \[Eta]]
]
(* Standardized Euclidean distance goal function *)
sedGoalFun[mask_?NumberQ, qs_?NumberQ, qe_?NumberQ, ashCoeff_?NumberQ, tmpfASH_?NumberQ,
tmp\[Theta]_, tmp\[Gamma]_, \[Eta]_?NumberQ, k_?NumberQ,
l_?NumberQ] := Module[{CSW, CGJ, tmpPar, kk},
(*arg: mask - maska connectomu, qs,qe, ashCoeff,\[Theta],\[Gamma],No of input
Comb,
No of synnaptic Comb,\[Eta]*)
CSW = connSW qs mask;
CGJ = connGJ qe;

```

```

tmpPar = {\[Gamma] -> tmp\[Gamma], \[Theta] -> tmp\[Theta],
  ash[t] -> ashCoeff * tmp\[Theta][[1]], fASH -> tmpfASH};

kk = Table[
  diffSingleAblation[CSW, CGJ, abl[[i]], polarMatrixSubst[1], dox[[k]], phys-
Param,
  tmpPar], {i, 1, Length[abl]};
  sed[eFun[kk, \[Eta]], errTfTbunit, expTfTbunit]
]

diffAllAblations[mask_, qs_?NumberQ, qe_?NumberQ, ashCoeff_?NumberQ, tmpfASH_?
NumberQ, tmp\[Theta]_, tmp\[Gamma]_, \[Eta]_?NumberQ, k_?NumberQ,
l_?NumberQ] := Module[{CSW, CGJ, tmpPar, kk},
  (*arg: mask - maska connectomu, qs, qe, ashCoeff, \[Theta], \[Gamma], No of input
Comb,
  No of synnaptic Comb, \[Eta]*)
  CSW = connSW qs mask;
  CGJ = connGJ qe;
  tmpPar = {\[Gamma] -> tmp\[Gamma], \[Theta] -> tmp\[Theta],
  ash[t] -> ashCoeff * tmp\[Theta][[1]], fASH -> tmpfASH};

  kk = Table[
    diffSingleAblation[CSW, CGJ, abl[[i]], polarMatrixSubst[1], dox[[k]], phys-
Param,
    tmpPar], {i, 1, Length[abl]}]
]

```

```

(* Mathematica package CElegansPhysMorphData.m
  by F. Rakowski.
  last mod. 05.04.2017 *)

```

```

(* PHYSIOLOGICAL CONSTANTS *)

```

```

physParam= {
cC -> 1, (*uF/cm^2 Capacitance of the membrane*)
gL -> 0.0067, (*mS/cm^2 leak conductance*)
vL -> -60, (*mV leak reversal potential*)
gCa -> 0.043, (*mS/cm^2 Calcium conductance*)
vCa -> 120, (*mV Calcium reversal potential*)
gKCa -> 0.057, (*mS/cm^2 Potasium-Ca gated conductance*)
vK -> -90, (*mV Potasium reversal potential*)
kD -> 30, (*uM Calcium concentration*)
vCl -> -50, (*mV Chloride reversal potential*)
tauCa -> 150, (*ms - relaxation time for Ca concentration*)
far -> 9.648, (*10 mC/umol = 10 kC/mol Faraday constant*)
d -> 0.5 (*um *) }

```

```

(*CONNECTIVITY MATRIX*)

```

```

(* Numerical values of synaptic connectivity matrix *)
connSW = {{0, 0, 0, 0, 0, 0, 0, 0, 0}, {1.75, 0, 6.75, 15.75, 10.5, 2., 0.25,
0, 5.}, {2.25, 0.5, 0, 0.25, 0, 0.5, 0, 0, 7.75}, {3., 1., 0.75, 0,
0.25, 0, 0.25, 0, 3.25}, {0.75, 1., 0.75, 0, 0, 7., 0, 0, 1.25}, {0,
0, 0, 0, 0, 0, 0.5, 2.}, {0, 41.75, 1.5, 7., 8.25, 1., 0, 0,
1.}, {0, 2.5, 0.25, 0.25, 0.25, 6.5, 0, 0, 12.}, {0, 7., 0, 0.25,
0.25, 2., 1.25, 0.25, 0}};

```

```

(* Numerical values of gap junction connectivity matrix *)

```

```

connGJ = {{0, 0, 0, 0, 0, 0, 0, 0, 0}, {0, 0, 0, 0, 0, 0, 25.5, 3.5, 2.5}, {0,
0, 0, 0, 1., 0.5, 13.75, 0}, {0, 0, 0, 0, 0, 0, 0, 0, 0}, {0, 0,
0, 0, 0, 0, 0, 0}, {0, 0, 1., 0, 0, 0, 0, 0.5, 0.5}, {0, 25.5,
0.5, 0, 0, 0, 0, 0, 0.75}, {0, 3.5, 13.75, 0, 0, 0.5, 0, 0,

```

```

0.75}, {0, 2.5, 0, 0, 0, 0.5, 0.75, 0.75, 0}};

(* Logical presence of connections*)
BINconnSW = connSW /. x_ /; x != 0 -> 1;
BINconnGJ = connGJ /. x_ /; x != 0 -> 1;

(*Synaptic polarity Matrix*)
\[Epsilon] = BINconnSW /. x_ /; x == 0 -> False

(* Sigmoidal function parameteres *)
hfun1={0.08,-70}; (*for ASH neuron*)
hfun2={0.08,-40}; (*for Interneurons and Motoneurons*)

(* Mathematica package CElegansExperimentalData.m
by F. Rakowski.
last mod. 05.04.2017 *)

(* Matrix of all ablations used in the experiment *)
ablMatrix = {{1, 1, 1, 1, 1, 1, 1}, {0, 1, 1, 1, 1, 1, 1}, {1, 0, 1, 1, 1, 1, 1},
1},
{1, 1, 0, 1, 1, 1, 1}, {1, 1, 1, 0, 1, 1, 1}, {1, 1, 1, 1, 1, 0, 1},
{1, 1, 1, 1, 1, 1, 0}, {0, 0, 1, 1, 1, 1, 1}, {0, 1, 0, 1, 1, 1, 1},
{0, 0, 0, 1, 1, 1, 1}, {1, 0, 0, 1, 1, 1, 1}, {1, 0, 1, 1, 1, 1, 0},
{1, 1, 0, 1, 1, 1, 0}, {1, 0, 0, 1, 1, 1, 0}, {1, 1, 0, 0, 1, 1, 0},
{1, 1, 0, 1, 1, 0, 0}, {1, 0, 0, 1, 0, 1, 0}, {1, 1, 1, 1, 1, 0, 0}};

(* Definition of the ablation vector *)
abl = Table[
Flatten[{ablMatrix[[k, 1 ;; 6]], 1, 1, ablMatrix[[k, 7]]}], {k, 1,
18}];
(* Experimental data {Tforward, Tbackward}*)
expData = {{7.82, 2.53}, {12.05, 0.95}, {0.71, 0.53}, {2.26, 2.14}, {4.24,
3.12}, {1.51, 1.23}, {8.2, 1.7}, {1.91, 0.85}, {2.05, 2.04}, {0.75,
0.52}, {0.56, 0.46}, {4.09, 0.67}, {0.91, 1.19}, {0.93,
0.47}, {1.33, 0.94}, {2.04, 1.29}, {0.6, 0.39}, {2.18, 1.35}};

(* Ratio: *)
expTfTb = {3.09091, 12.6842, 1.33962, 1.05607, 1.35897, 1.22764, 4.82353, \
2.24706, 1.0049, 1.44231, 1.21739, 6.10448, 0.764706, 1.97872, \
1.41489, 1.5814, 1.53846, 1.61481};

(* Normalised Ratio:*)
expTfTbunit = {0.755556, 0.926923, 0.572581, 0.513636, 0.576087, 0.551095, \
0.828283, 0.692029, 0.501222, 0.590551, 0.54902, 0.859244, 0.433333, \
0.664286, 0.585903, 0.612613, 0.606061, 0.617564};

(* Error for normalised ratio: *)
errTfTbunit={0.0331723,0.0215089,0.0494927,0.071064,0.131853,0.0455805,0.0640241,
\
0.0970122,0.110012,0.0521812,0.103968,0.0367469,0.169268,0.0941945,0.128526, \
0.136071,0.0901046,0.0583286};

(* Mathematica package CElegansUtils.m
by F. Rakowski,
last mod. 5.04.2017 *)

(* Combinatorial Tools *)

```

```

fdo\[Epsilon][l_,dlugosc_]:=PadLeft[IntegerDigits[l-1,2],dlugosc]
(* fdo\[Epsilon] generates l-th variant of synaptic polarity *)

prog[zd_, zg_, a_] := Module[{w1, w2, dl},
  (* aux function: marking by ones all entries of the connectivity matrix,
  wchich values are between
  zd and zg. *)
  dl = Length[a];
  w1 = Array[
    a[[#1, #2]] /. x_ /; (x > zd && x <= zg) -> (-10) &, {dl, dl}];
  w2 = Array[w1[[#1, #2]] /. x_ /; x > (-10) -> 0 &, {dl, dl}]/(-10)
  ]

  polarMatrixSubst[k_] := Module[{co,zerosE},
  (*substitutes the wild type polarity matrix {Subscript[\[Epsilon], i,j]} by
  the matrix representig k-th
  variant of all possible polarity variants *)
  zerosE = ConstantArray[0, {9, 9}];
  co = Table[poz\[Epsilon][[i]] -> fdo\[Epsilon][k,Length[poz\[Epsilon]]][[i]],
  {i, 1, Length[poz\[Epsilon]]}];
  zerosE=ReplacePart[zerosE, co];
  zerosE[[All,7;;8]]=ConstantArray[1,{9,2}];
  zerosE
  ]

(*Auxiliary functions*)

eFun[pW_, \[Eta]_] := E^(pW/\[Eta])/(1 + E^(pW/\[Eta]));
sed[vDane_,vErr_,vProbe_]:=Sqrt[Total[((vDane-vProbe)/vErr)^2]]

compTfTb[pW_, \[Eta]_] :=
  EuclideanDistance[eFun[pW, \[Eta]], expTfTbunit];

prepare\[Gamma][ash_,int_,mot_]:=First/@{ash,int,int,int,int,int,mot,mot,int};
prepare\[Theta][ash_,int_,mot_]:=Last/@{ash,int,int,int,int,int,mot,mot,int};

(* Auxiliary visualisation functions *)
nlabelsAux=Prepend[Table[StringReplace[ToString[DeleteCases[-(abl[[i]]-
1)*fn[[;9],0]],"t"->""]]//ToUpperCase,{i,2,18}],{"WILD"}];
nlabels=Table[Rotate[StringReplace[nlabelsAux[[i]]//ToString,{" "->"-","{-
->"","}"->""}],90 Degree],{i,1,18}];

```
